# Supplementary material for: Coronin 1 Is Required for Integrin β2 Translocation in Platelets
Source: Int J Mol Sci. 2020 Jan 5;21(1):356. doi: 10.3390/ijms21010356 (PMC6982036; doi:10.3390/ijms21010356)
Supplement: Supplementary file 1 [file ijms-21-00356-s001.pdf]

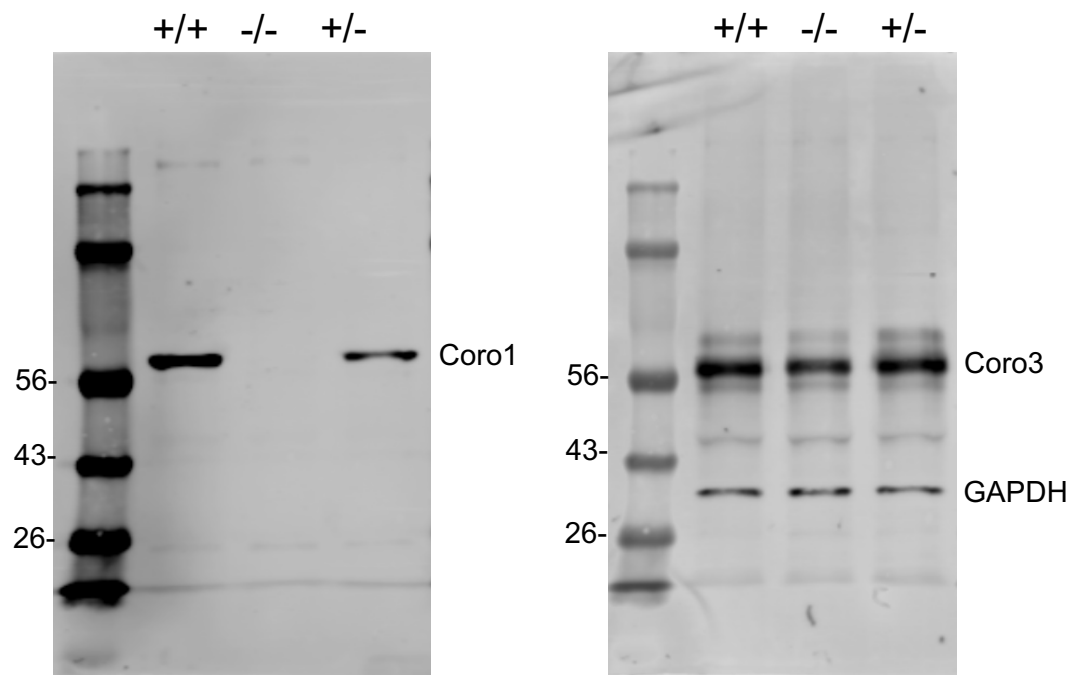

**Supplemental Figure 1.** Full length blots corresponding to Figure 1A.

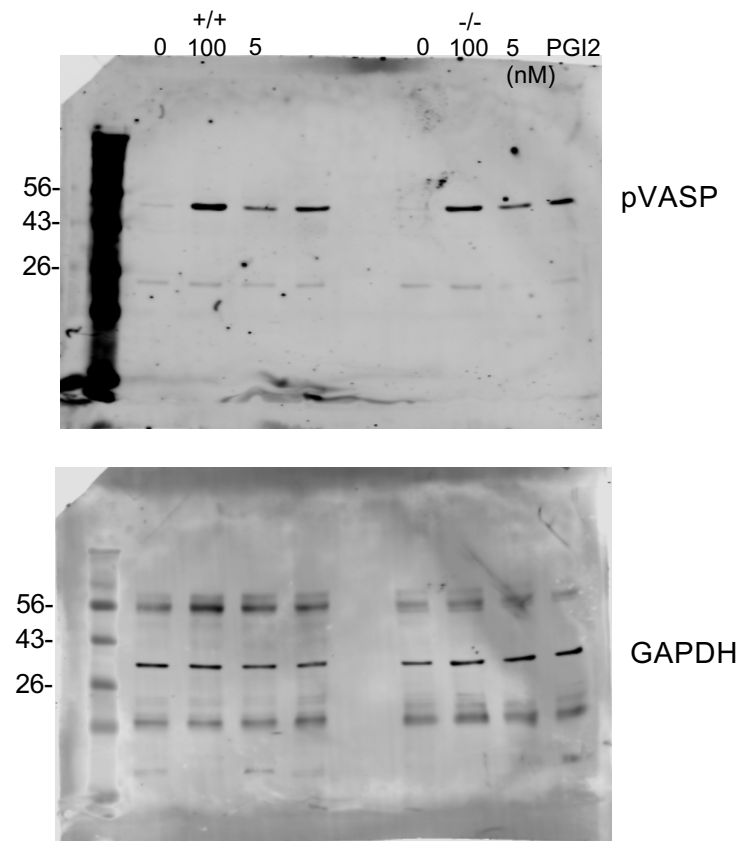

**Supplemental Figure 2.** Full length blots corresponding to Figure 7A. The fourth lane of each genotype corresponds to an experimental condition not included in the article.
